# Supplementary material
Source: PubMed Central journal article supplement (PMC7499755)
Supplement: pnaa294_supplementary_data.pdf [file pnaa294_supplementary_data.pdf]

# Initial survey

Please complete the survey below.

Thank you!

---

Today's date (hidden)

\_\_\_\_\_

---

## Information about you

What is your gender?

- Female
- Male
- Other or prefer not to answer

---

What is your age?

\_\_\_\_\_

---

What was your primary residency training?

- Anesthesiology
- Emergency Medicine
- Family Medicine
- Internal Medicine
- Orthopaedics
- Pediatrics
- Physical Medicine & Rehabilitation
- Radiology
- Unlisted or other

---

For how many years have you been practicing since completion of residency or fellowship?

If still in training, choose zero.

- 0
- 1
- 2
- 3
- 4
- 5
- 6
- 7
- 8
- 9
- 10
- 11
- 12
- 13
- 14
- 15
- 16
- 17
- 18
- 19
- 20
- 21
- 22
- 23
- 24
- 25
- 26
- 27
- 28
- 29
- 30
- 31
- 32
- 33
- 34
- 35
- 36
- 37
- 38
- 39
- 40
- 41
- 42
- 43
- 44
- 45
- 46
- 47
- 48
- 49
- 50+

**Information about your practice**

In which state do you practice?

- AL
- AK
- AR
- AZ
- CA
- CO
- CT
- DC
- DE
- FL
- GA
- HI
- IA
- ID
- IL
- IN
- KS
- KY
- LA
- MA
- MD
- ME
- MI
- MN
- MO
- MS
- MT
- NC
- ND
- NE
- NH
- NJ
- NM
- NV
- NY
- OH
- OK
- OR
- PA
- RI
- SC
- SD
- TN
- TX
- UT
- VA
- VT
- WA
- WI
- WV
- WY
- Outside of US

---

Which of the following descriptions best fits the location in which you practice?

- Rural
- Suburban
- Urban

Which of the following descriptions best fits your primary practice setting?

i.e. where you spend the majority of your clinical time

- Academic/University
- Ambulatory surgical center (ASC)
- Community clinic
- Hospital system employee
- Private practice, hospital-based
- Private practice, office-based (e.g. private ortho group)
- Private practice, solo
- VA or other government-sponsored practice
- Other

Please explain

\_\_\_\_\_

CLINIC PATIENTS: Approximately how many patients did you see in clinic in a typical week, before the pandemic?

\_\_\_\_\_

PROCEDURES: Approximately how many total procedures did you perform in a typical week, before the pandemic?

e.g. injections, EMGs, etc.

\_\_\_\_\_

**What has changed due to COVID-19?**

IN PERSON: Since the pandemic has begun, what percentage of patients are you now seeing IN PERSON compared to your typical practice? (Do not include procedures)

For example, if you have had to cut down your practice by half, and seeing only half of the remaining patients in person, please choose 25%.

0% 50% 100%+

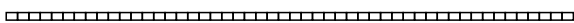

(Place a mark on the scale above)

BY TELEPHONE: Since the pandemic has begun, What percentage of patients are you now "seeing" BY TELEPHONE (not video/telehealth) compared to your typical practice?

For example, if you have had to cut down your practice by half, and seeing only half of the remaining patients by telephone, please choose 25%.

0% 50% 100%+

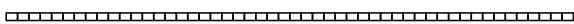

(Place a mark on the scale above)

BY TELEHEALTH: Since the pandemic has begun, What percentage of patients are you seeing BY TELEHEALTH (use of video, not just telephone) compared to your typical practice?

For example, if you have had to cut down your practice by half, and seeing only half of the remaining patients by telehealth, please choose 25%.

0% 50% 100%+

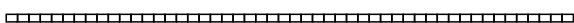

(Place a mark on the scale above)

---

PROCEDURES: Since the pandemic has begun, what percentage of PROCEDURES are you performing compared to your typical practice?

0%                      50%                      100%+

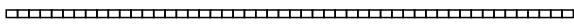

(Place a mark on the scale above)

---

On which date did you start reducing your patient load due to the pandemic?

\_\_\_\_\_

---

On which date did you start reducing your procedure load due to the pandemic?

\_\_\_\_\_

---

Please select WHY you have a reduced load?

- Concerns about personal or family safety
- Concerns about staff safety
- Concerns about patients you directly interact with
- Concerns about public safety
- Concerns about overwhelming the healthcare system
- Limited Personal Protective Equipment (PPE)
- Requirement from administration
- Fewer patients are coming in of their own accord
- Concerns about corticosteroids
- Other

---

Please explain other reasons

---

Please select why your practice continues to have a normal amount of clinic patients.

- Currently not worried about spread of the virus
- Too many patients still need care, or patient expectations
- Concerns about personal income
- Concerns about practice financial viability
- Trying to offload other portions of the healthcare system
- Unaware of current guidelines for this virus
- Other

---

Please explain other reasons

**How are you treating (or plan on treating) the following patients?**

|                                         | No change to practice | Try to see less often<br>in person | Will not see in person | I do not regularly see<br>these patients |
|-----------------------------------------|-----------------------|------------------------------------|------------------------|------------------------------------------|
| Patients 65 or older                    | <input type="radio"/> | <input type="radio"/>              | <input type="radio"/>  | <input type="radio"/>                    |
| Immunocompromised patients              | <input type="radio"/> | <input type="radio"/>              | <input type="radio"/>  | <input type="radio"/>                    |
| Patients with cardiovascular<br>disease | <input type="radio"/> | <input type="radio"/>              | <input type="radio"/>  | <input type="radio"/>                    |
| Patients with pulmonary disease         | <input type="radio"/> | <input type="radio"/>              | <input type="radio"/>  | <input type="radio"/>                    |
| Patients with asthma                    | <input type="radio"/> | <input type="radio"/>              | <input type="radio"/>  | <input type="radio"/>                    |
| Active smokers                          | <input type="radio"/> | <input type="radio"/>              | <input type="radio"/>  | <input type="radio"/>                    |

**Since the pandemic, are you prescribing/suggesting more or less of each type of medication?**

|                              | Much less             | Slightly less         | Unchanged             | Slightly more         | Much more             |
|------------------------------|-----------------------|-----------------------|-----------------------|-----------------------|-----------------------|
| Opioids                      | <input type="radio"/> |
| NSAIDs                       | <input type="radio"/> |
| Acetaminophen                | <input type="radio"/> |
| Oral corticosteroids         | <input type="radio"/> |
| Neuropathic pain medications | <input type="radio"/> |
| Muscle relaxants             | <input type="radio"/> |

How much would you say you have changed the frequency of your opioid prescriptions?

- 10%
- 20%
- 30%
- 40%
- 50%
- 60%
- 70%
- 80%
- 90%
- 100% or more

How much would you say you have changed the frequency of your NSAID prescriptions/suggestions?

- 10%
- 20%
- 30%
- 40%
- 50%
- 60%
- 70%
- 80%
- 90%
- 100% or more

As you noted above, you are seeing fewer clinic patients due to the pandemic. Do you find that you are sending patients more or less frequently to the emergency room or urgent care due to the pandemic?

- Unchanged
- I send them less often
- I send them more often

How often are you now sending patients to the emergency room or urgent care, due to the inability to see them in clinic or provide a procedure?

- Monthly  
 Weekly  
 Daily  
 Many times daily

Have any of the following tested positive for COVID (or, if testing unavailable, please answer yes if there is a high likelihood and requiring self-quarantine)?

- Self  
 Someone you're living with  
 One of your patients  
 Staff you work with  
 Colleagues in your department/group  
 Someone in the building  
 Someone in the hospital system

Are you aware of a hospitalization required for anyone you know personally?

- Yes  
 No

Patient Health Questionnaire Version 4 (PHQ-4)

I would prefer not to fill out the PHQ-4.

Due to the anonymous nature of the survey, we will be unable to follow up on any scores.

- OK to complete  
 I would rather skip it

**Over the last 2 weeks, how often have you been bothered by any of the following problems?**

|                                             | Not at all            | Several days          | Over half the days    | Nearly every day      |
|---------------------------------------------|-----------------------|-----------------------|-----------------------|-----------------------|
| Feeling nervous, anxious, or on edge        | <input type="radio"/> | <input type="radio"/> | <input type="radio"/> | <input type="radio"/> |
| Not being able to stop or control worrying  | <input type="radio"/> | <input type="radio"/> | <input type="radio"/> | <input type="radio"/> |
| Little interest or pleasure in doing things | <input type="radio"/> | <input type="radio"/> | <input type="radio"/> | <input type="radio"/> |
| Feeling down, depressed, or hopeless        | <input type="radio"/> | <input type="radio"/> | <input type="radio"/> | <input type="radio"/> |

PHQ total (hidden)

\_\_\_\_\_

PHQ anxiety total (hidden)

\_\_\_\_\_

PHQ depression total (hidden)

\_\_\_\_\_
